# Supplementary material
Source: publisher site journal article supplement (https://www.dovepress.com/article/575832)
Supplement: Supplementary file 1 [file 575832%20Revised%20Supplementary%20Material.docx]

| **Rank** | **Country** | **Count** | **Rank** | **Institution** | **Count** |
| --- | --- | --- | --- | --- | --- |
| 1 | USA | 435 | 1 | National Cancer Institute (USA) | 79 |
| 2 | China | 196 | 2 | Johns Hopkins University (USA) | 41 |
| 3 | Italy | 103 | 3 | Fred Hutchinson Cancer Research Center (USA) | 28 |
| 4 | England | 79 | 4 | Johns Hopkins Bloomberg School of Public Health (USA) | 20 |
| 5 | South Korea | 53 | 5 | Karolinska Institute (Sweden) | 19 |
| 6 | Canada | 51 | 6 | University of Washington (USA) | 19 |
| 7 | Germany | 43 | 7 | Washington University (USA) | 18 |
| 8 | Australia | 37 | 8 | Duke University (USA) | 18 |
| 9 | Turkey | 35 | 9 | University of California San Diego (USA) | 17 |
| 10 | Japan | 34 | 10 | University of Texas MD Anderson Cancer Center (USA) | 17 |

S-Table 1. Top 10 countries and institutions involved in research on the connections between chronic inflammation, immune function, prostate cancer progression, and aging

| **Rank** | **Authors** | **h-**  **index** | **g-**  **indx** | **Total Citation Counts** | **Publications on aging and immune function in prostate cancer** | **Citation counts on aging and immune function in prostate cancer** | **Co-cited authors** | **Citations** |
| --- | --- | --- | --- | --- | --- | --- | --- | --- |
| 1 | Hebert, James R. | 116 | 198 | 37788 | 17 | 712 | Shivappa, N | 194 |
| 2 | Platz, Elizabeth A. | 113 | 201 | 44323 | 16 | 344 | Sfanos, K. S. | 167 |
| 3 | De Marzo, Angelo M. | 132 | 202 | 66112 | 15 | 374 | De Marzo, Angelo M. | 140 |
| 4 | Shivappa, Nitin | 89 | 141 | 24475 | 15 | 695 | Nickel, J. C. | 107 |
| 5 | Freedland, Stephen J. | 110 | 196 | 48112 | 11 | 288 | De Nunzio, C. | 99 |
| 6 | Artibani, Walter | 93 | 121 | 31345 | 10 | 59 | .Siegel, R. L. | 92 |
| 7 | Drake, Charles G. | 91 | 192 | 73331 | 9 | 373 | Jemal, A | 88 |
| 8 | Novella, Giovanni | 25 | 43 | 2311 | 9 | 57 | Coussens, L. M. | 82 |
| 9 | Processali, Tania | 20 | 22 | 703 | 9 | 58 | Hanahan, D. | 77 |
| 10 | Siracusano, Salvatore | 35 | 62 | 684 | 9 | 55 | Porcaro, A. B. | 72 |

S-Table 2. Top 10 authors and co-cited authors contributing to research on chronic inflammation, immune function, prostate cancer progression, and aging

| **Rank** | **Co-cited reference** | **Main research content** | **Citations** |
| --- | --- | --- | --- |
| 1 | De Marzo A. M., 2007, Nat Rev Cancer, v7, p256, doi 10.1038/nrc20904 | Explores the inflammation-cancer link in prostate cancer, focusing on the role of chronic inflammation in tumor development and progression. | 88 |
| 2 | Coussens L. M., 2002, Nature, v420, p860, doi 10.1038/nature0132232 | Discusses the role of tumor-associated inflammation in cancer development and the immune system's dual role in cancer promotion and suppression. | 70 |
| 3 | Sfanos K. S., 2012, Histopathology, v60, p199, doi 10.1111/j.1365-2559.2011.04033.x25 | This study investigates the inflammatory microenvironment in prostate cancer, focusing on the role of immune cells and chronic inflammation in cancer development. It discusses the presence of bacteria such as Propionibacterium acnes and its potential contribution to inflammation and carcinogenesis. | 66 |
| 4 | Hanahan D., 2011, Cell, v144, p646, doi 10.1016/j.cell.2011.02.01336 | Outlines the hallmarks of cancer, emphasizing immune evasion, tumor microenvironment, and inflammation in cancer biology. | 51 |
| 5 | Jemal A., 2011, CA Cancer J Clin, v61, p134, doi 10.3322/caac.2011564 | Comprehensive analysis of cancer statistics, focusing on trends in incidence, mortality, and survival rates worldwide. | 49 |
| 6 | De Nunzio C., 2011, Eur Urol, v60, p106, doi 10.1016/j.eururo.2011.03.05565 | Examines the link between benign prostatic hyperplasia (BPH) and prostate cancer, exploring the overlapping mechanisms and role of inflammation. | 43 |
| 7 | Kantoff P. W., 2010, New Engl J Med, v363, p411, doi 10.1056/nejmoa100129466 | Discusses the use of sipuleucel-T immunotherapy for metastatic castration-resistant prostate cancer and its therapeutic effectiveness. | 43 |
| 8 | Grivennikov S. I., 2010, Cell, v140, p883, doi 10.1016/j.cell.2010.01.02567 | Highlights the role of cytokine-mediated inflammation in tumor promotion, focusing on chronic inflammation and immune responses in cancer. | 39 |
| 9 | Gurel B., 2014, Cancer Epidemiology Biomarkers & Prevention, v23, p847, doi 10.1158/1055-9965.epi-13-112617 | Investigates the link between inflammation in benign prostate tissue and the risk of developing prostate cancer. | 39 |
| 10 | Mantovani A., 2008, Nature, v454, p436, doi 10.1038/nature0720568 | Explores the role of tumor-associated macrophages (TAMs) in supporting tumor growth through immune suppression, angiogenesis, and tissue remodeling. | 36 |

S-Table 3. Top 10 co-cited references in research exploring the connections between chronic inflammation, immune function, prostate cancer progression, and aging

| **Rank** | **Strength** | **Main Research Content** | **Source** |
| --- | --- | --- | --- |
| 1 | 5.31 | Describes the efficacy of sipuleucel-T immunotherapy for metastatic castration-resistant prostate cancer. | New Engl J Med, 2010 |
| 2 | 4.93 | Associates prostatic inflammation with an increased risk of prostate cancer, suggesting a precursor role for inflammation. | Cancer Epidemiol Biomarkers Prev, 2014 |
| 3 | 4.9 | Investigates immune system interactions with prostate cancer, focusing on inflammation and infections. | Adv Exp Med Biol, 2014 |
| 4 | 4.48 | Outlines the hallmarks of cancer, with a focus on immune evasion and tumor-promoting inflammation. | Cell, 2011 |
| 5 | 4.24 | Explores chronic inflammation's role in promoting tumorigenesis, with a focus on cytokine networks. | Cell, 2010 |
| 6 | 4.03 | Examines the efficacy of anti-PD-1 antibodies in treating advanced solid tumors, including prostate cancer. | New Engl J Med, 2012 |
| 7 | 3.9 | Provides detailed pathological insights into the grading and staging of prostate cancer, focusing on the updated Gleason grading system and its implications for diagnosing and predicting prostate cancer outcomes. | Am J Surg Pathol, 2016 |
| 8 | 3.7 | Continues to study the link between pro-inflammatory diets and increased prostate cancer risk. | Br J Nutr, 2015 |
| 9 | 3.68 | Investigates the dietary inflammatory index and its association with prostate cancer risk. | Public Health Nutr, 2014 |
| 10 | 2.53 | Highlights cellular senescence as a central mechanism linking prostate ageing to benign and malignant prostate diseases. | Nat Rev Urol,2021 |

S-Table 4. The main research contents of the 10 references with the strongest citation bursts in the study of chronic inflammation, immune function, prostate cancer progression, and aging
